# Supplementary material for: New fossils of Australopithecus sediba reveal a nearly complete lower back
Source: eLife. 2021 Nov 23;10:e70447. doi: 10.7554/eLife.70447 (PMC8610421; doi:10.7554/eLife.70447)
Supplement: Figure 5—source data 1. [file elife-70447-fig5-data1.xlsx]

## Sheet: Fig.5_Lumbar wedging angles
Figure 5–source data 1. Lumbar wedging angles and combined wedging angles values of extant taxa.
H.sapiensMaleL2	H.sapiensMaleL3	H.sapiensMaleL4	H.sapiensMaleL5	H.sapiensMaleSum	H.sapiensFemaleL2	H.sapiensFemaleL3	H.sapiensFemaleL4	H.sapiensFemaleL5	H.sapiensFemaleSum	P.troglodytesL1	P.troglodytesL2	P.troglodytesL3	P.troglodytesL4	P.troglodytesL1-4Sum	G.gorillaL1	G.gorillaL2	G.gorillaL3	G.gorillaL4	G.gorillaL1-4Sum	PongoL1	PongoL2	PongoL3	PongoL4	PongoL1-4Sum		N	O	P	Q	R	S	T	U	V	W	X	Y	Z
5.19569	1.83494	-2.96291	-6.82189	-15.1328	0	-1.19114	-5.72481	-9.92994	-18.2008	2.77789	4.48925	-0.734237	0.55602	7.08892	2.22594	0.929685	-0.788071	1.422	3.78955	2.56176	3.61402	6.06695	2.90633	15.1491
4.28091	8.93432	3.36416	-5.326	-13.5112	0.858348	0.203899	-2.15815	-9.30888	-16.8459	2.58414	-1.10497	0.237544	-5.23127	-3.51455	4.59492	2.67169	2.18429	-1.10224	8.34865	14.3513	8.61442	7.80791	-1.52835	29.2453
4.20188	2.01289	-1.37871	1.75382	-11.064	0.661098	0.861574	-7.28237	-7.60156	-16.5457	4.94367	7.3628	6.6461	-0.856527	18.096	2.64395	1.90554	1.43232	-3.13388	2.84793	11.1799	6.08466	-1.00089	3.90691	20.1705
1.34158	0.904651	-1.81876	-9.57617	-11.0449	2.92511	2.34055	-1.07292	2.21114	-13.3613	7.40719	7.89974	7.07937	4.91075	27.297	-0.427419	2.58418	-3.22679	-0.656803	-1.72683	8.72186	8.31785	11.2973	7.68412	36.0212
9.83676	6.32626	1.20618	-6.59784	-9.1487	0.881456	0.21621	-3.67432	-7.05218	-12.6891	2.03708	9.55047	3.31071	-3.72269	11.1756	-0.0641131	1.07789	-3.92368	-1.91188	-4.82178	0.994262	7.28311	7.38848	2.31048	17.9763
6.35966	1.21532	-0.84257	-7.31119	-8.97661	2.03878	1.58594	-0.774256	-8.91121	-10.5596	4.29019	1.63626	0.478983	-4.22344	2.18199	8.26906	2.48687	0.551506	-4.25611	7.05132	-0.444013	3.19561	2.45333	-5.16808	0.0368446
0.622774	-3.9205	-3.91258	-3.83461	-7.51985	-1.76583	-3.28656	-7.90934	-5.2391	-10.4048	2.99779	2.325	4.56016	2.8447	12.7276	0.816222	3.54665	-0.45867	0.313205	4.21741	5.13327	5.7413	-0.282895	7.97718	18.5689
3.89088	2.41659	-0.434057	-2.48438	-6.56098	-2.07071	-2.98578	-3.06088	-8.42836	-9.62884	5.03655	4.89798	-1.40244	-2.96851	5.56359	-1.06293	0.16488	1.63807	1.30542	2.04543	2.78433	8.40497	5.05152	-1.31592	14.9249
6.73292	2.5628	1.17085	-1.49589	-5.72485	3.9706	4.15322	-0.636613	-5.39344	-6.06074	1.68376	-2.40481	-2.57559	-1.9225	-5.21913	1.52615	3.95326	2.06554	-0.685114	6.85983	3.54079	4.47849	5.41199	1.02888	14.4601
-0.99068	-0.931618	-4.58122	-8.62931	-5.37247	3.3509	2.98867	1.90968	-4.05309	-3.84493	3.55921	7.73959	7.49104	1.39071	20.1805	1.03857	2.21967	-1.80919	1.91685	3.3659	4.4052	5.03979	3.50343	1.85831	14.8067
3.50261	2.60391	-2.12899	-5.55277	-4.7121	1.23655	1.21471	0	-6.29619	-1.57416	5.01687	1.46008	2.83354	-2.35903	6.95146	2.75014	1.15649	-0.636024	-1.98871	1.2819
4.09082	-4.82931	-4.73522	-8.03748	-4.59231	2.34262	0.723944	-4.4284	-9.1978	-1.19115	1.68152	2.78058	2.21008	-1.82341	4.84877	2.50053	2.6929	3.52193	1.48641	10.2018
-2.04606	-0.552688	-0.572953	-2.55315	-4.43235	-0.67406	-0.806969	-1.13453	-10.0736	2.09376	5.03666	8.45722	3.91818	0.407568	17.8196	5.23942	5.70754	3.54749	-0.846966	13.6475
2.79436	0	-5.32999	-8.52833	-4.15169	5.66806	4.04066	-3.09974	-7.80013	4.19616	0.833378	3.36937	4.56334	6.99502	15.7611	3.63171	4.39977	1.91204	-6.15621	3.78732
12.8013	-0.349363	-1.03857	-7.54649	-3.80384	4.76245	6.58856	1.85704	-2.02064	6.40388	5.55419	5.73311	1.48351	-3.19372	9.57708	7.5218	3.95724	2.62862	1.59719	15.7048
3.37983	3.53021	0.707346	-3.51706	-3.67262	5.98096	5.62197	-0.0543431	-5.05493	11.1874	4.20882	2.04169	3.32975	0.641799	10.2221	1.37364	2.90066	0.458929	1.37687	6.1101
4.63762	3.31523	0.909438	-3.99173	-2.85504	3.46458	-1.20518	-2.3596	-3.77922	-18.1689	5.08661	6.94526	2.69013	-2.45197	12.27	4.08832	5.09188	1.35565	-0.683624	9.85223
-0.831698	-1.86615	-1.21165	-5.06712	-2.75417	0.228725	3.23358	-1.71385	-6.08956	-9.49621	4.67231	6.77818	4.50715	0.42242	16.3801	1.53604	-0.14575	1.11711	1.72096	4.22836
0.18364	0.250564	-0.815004	-6.18018	-1.57524	3.4846	1.69753	-0.804138	-6.01468	-4.3411	2.89932	4.3349	-3.6471	-5.90177	-2.31464	2.22035	3.5337	-2.00462	-2.45436	1.29507
4.06759	5.75674	-2.99127	-11.5452	-1.08814	3.27575	1.65839	2.0291	-7.40171	-2.70317	7.89729	1.41756	8.33525	2.73635	20.3864	0.4172	1.74615	0.976411	-1.00418	2.13558
11.2766	11.2439	0.598607	-10.7886	-0.578781	1.22422	-1.25543	-5.79152	-12.3462	-1.63669	8.21946	5.26694	5.53613	2.211	21.2335	4.06468	2.87735	4.98358	3.49608	15.4217
7.95436	5.89289	3.0326	-8.65012	0.281711	4.54685	0.913061	0.45563	-8.61871	-0.438468	3.26364	2.86419	7.23851	0.238426	13.6048	-3.96879	-2.22984	-0.428316	-1.49796	-8.1249
3.23908	3.21701	2.49073	-0.165356	0.415406	-0.18247	0.367279	-1.63432	-8.0467	-14.5015	2.45451	2.66491	8.15824	0.144732	13.4224	3.35111	3.20717	2.90316	-0.682512	8.77893
3.65594	1.46072	0.990461	-2.07249	1.31518	3.50314	1.70599	-0.127992	-6.68081	-1.59967	3.75882	1.88712	3.39297	-2.13926	6.89965	0.255025	1.74909	7.10995	0.900858	10.0149
3.10199	2.32653	-0.638386	-8.94182	3.38903	3.23503	5.51648	0.413294	-5.26335	3.90146	3.08141	-0.0682093	4.87762	2.72453	10.6153	5.67381	7.53037	3.34651	-3.88896	12.6617
-0.517383	0.297736	0.977535	-6.13036	3.48387	1.33758	-3.39203	-6.19512	-6.25191	-9.59199	-1.12838	4.49234	0.820903	-0.673805	3.51106	1.15857	1.39329	4.96732	1.76825	9.28743
1.73944	0.292325	2.48997	-4.24002	3.86688	0.300582	1.06503	-1.95056	-9.00704	4.97833	2.41985	2.4535	-0.576876	-3.2663	1.03018	-2.81057	-0.203641	-0.482488	-1.92303	-5.41973
5.91504	4.53591	1.78693	-4.3597	4.03463	3.05621	3.10598	-0.415971	-0.767888	-6.06478	12.3568	6.11422	0.311389	-2.09818	16.6843	6.67868	1.36887	3.28236	-3.51416	7.81575
3.30382	0.883873	2.36002	-6.13231	4.10033	5.00072	-2.03047	0.97765	-10.0127	-3.25127	2.38316	4.31195	2.6707	1.0852	10.451	1.44435	3.0623	4.32542	-0.894466	7.93761
3.15627	-0.463462	-0.593436	-9.61922	4.87056	1.2696	-0.155273	-0.39282	-3.97279	-2.13538	4.93831	0.356525	-0.717983	-3.31246	1.26439	2.45086	5.80125	-0.424313	-2.68282	5.14497
3.46694	5.13318	2.21272	-4.75232	5.00993	-0.27638	3.63945	2.30893	-7.80738	9.33359	3.2055	4.73044	3.4271	2.49874	13.8618	1.08597	4.21435	0.837694	-2.71286	3.42515
6.36903	6.19677	4.83778	-1.87667	6.06052	2.39067	3.15126	4.62744	-0.835778		11.1866	8.09035	10.1855	2.26553	31.728
8.78839	5.8655	1.30043	-3.472	6.58988						8.56798	8.80937	3.78853	2.19457	23.3605
7.73452	2.83212	1.09645	-3.41266	7.87818						4.34509	7.05232	4.52001	-4.88569	11.0317
6.4467	2.08792	-2.84829	-9.49018	8.22974						5.7138	6.1982	1.37695	-1.47469	11.8143
7.21005	2.93918	-6.86228	-6.95956	8.25043						8.31432	4.86296	3.2898	0.603723	17.0708
5.90002	3.60221	-8.25116	-5.68342	8.78146						7.7765	3.12194	6.55502	-0.962107	16.4913
5.61497	1.7361	-0.317752	-3.54945	8.97069						2.66392	9.86661	9.93369	-0.797701	21.6665
5.61529	2.34603	-0.281711	-6.36443	10.7714						11.468	10.8509	6.11504	0.279686	28.7136
3.20665	0.338265	1.13672	-7.53667	11.2534						-0.0432911	0.0398302	1.80898	-1.90714	-0.10162
4.18765	3.80881	-1.6479	-10.9409	12.3306						1.72073	1.52067	2.49157	1.54677	7.27975
4.03619	4.20197	2.88383	-6.11206	12.4823						5.0946	3.64487	1.00229	-3.35915	6.38259
8.6702	3.59076	-1.57204	-5.97023	15.5269						5.7725	7.54716	10.924	1.50682	25.7504
8.71597	6.89965	2.46078	-9.31101	-4.66289
1.7361	1.90264	-1.3595	-6.94213	4.71869
5.91853	4.33281	1.05449	-4.25531	7.05052
4.60505	1.93872	0.320087	-7.952	8.76538
-3.38663	-4.21247	-5.06865	-2.92461	-15.5924
