# Supplementary material for: New fossils of Australopithecus sediba reveal a nearly complete lower back
Source: eLife. 2021 Nov 23;10:e70447. doi: 10.7554/eLife.70447 (PMC8610421; doi:10.7554/eLife.70447)
Supplement: Figure 6—source data 1. [file elife-70447-fig6-data1.xlsx]

## Sheet: Figure 6-source data 1
Figure 6–source data 1. Inter-articular facet ratios of fossil hominins and extant taxa.
Pongo	G.gorilla	P.troglodytes	H.sapiens	Kebara 2	Shanidar 3	La Chapelle 1	KNM-WT 15000	MH2	Sts 14	StW 431	A.L. 288 (L2)	A.L. 288 (L3)
0.741935	0.576698	0.664179	1.34885	2.02376	1.54794	1.68786	1.67688	1.43478	1.54113	1.39082	1.386	1.25543
0.746939	0.653563	0.667475	1.36217
0.803636	0.65407	0.706503	1.40451
0.841818	0.663185	0.709091	1.41422
0.853755	0.666667	0.71189	1.42018
0.892	0.674863	0.716012	1.443
0.924949	0.67502	0.727975	1.47249
1.00787	0.697068	0.747772	1.4774
1.011	0.717822	0.756746	1.48571
1.02823	0.726154	0.761819	1.50033
1.0443	0.75873	0.768116	1.501
1.04688	0.776978	0.777778	1.52002
1.06522	0.812572	0.788342	1.52966
1.31108	0.816327	0.796057	1.53513
	0.836662	0.798825	1.53752
	0.840116	0.806142	1.53883
	0.842809	0.809061	1.55951
	0.847973	0.810398	1.58814
	0.855882	0.81619	1.59693
	0.85879	0.832551	1.61683
	0.86901	0.847561	1.62664
	0.907285	0.848085	1.64479
	0.92429	0.851485	1.64787
	0.953608	0.853333	1.65999
	0.973046	0.854305	1.67832
		0.861268	1.67874
		0.861423	1.68066
		0.8663	1.68227
		0.868896	1.68251
		0.908273	1.68493
		0.912332	1.69045
		0.921012	1.7048
		0.924771	1.71538
		0.93005	1.72769
		0.934853	1.73398
		0.955224	1.77441
		0.958848	1.78462
		0.994039	1.78707
		1	1.7958
		1.02326	1.80057
		1.02404	1.8088
		1.0515	1.82453
		1.14416	1.82995
			1.8312
			1.87656
			1.88259
			1.91575
			1.91859
			1.9293
			1.9388
			1.94134
			1.95313
			2.03604
			2.04301
